# Supplementary material for: Designed multi-stranded heme binding β-sheet peptides in membrane
Source: PubMed Central journal article supplement (PMC5477022; doi:10.1039/c5sc04108b), 2015-12-17
Supplement: SC-007-C5SC04108B-s001.pdf [file SC-007-C5SC04108B-s001.pdf]

## Supplementary Results

### Designed Multi-stranded Heme Binding $\beta$ -Sheet Peptides in Membrane

Areetha D'Souza, Mukesh Mahajan and Surajit Bhattacharjya\*

School of Biological Sciences, Structural Biology and Biochemistry, Nanyang Technological University,  
Singapore 637551.

\*Address correspondence to: Surajit Bhattacharjya, School of Biological Sciences, 60 Nanyang Drive,  
Singapore, 637551, e-mail: [surajit@ntu.edu.sg](mailto:surajit@ntu.edu.sg), Fax: 65-6791-3856

Figure S1

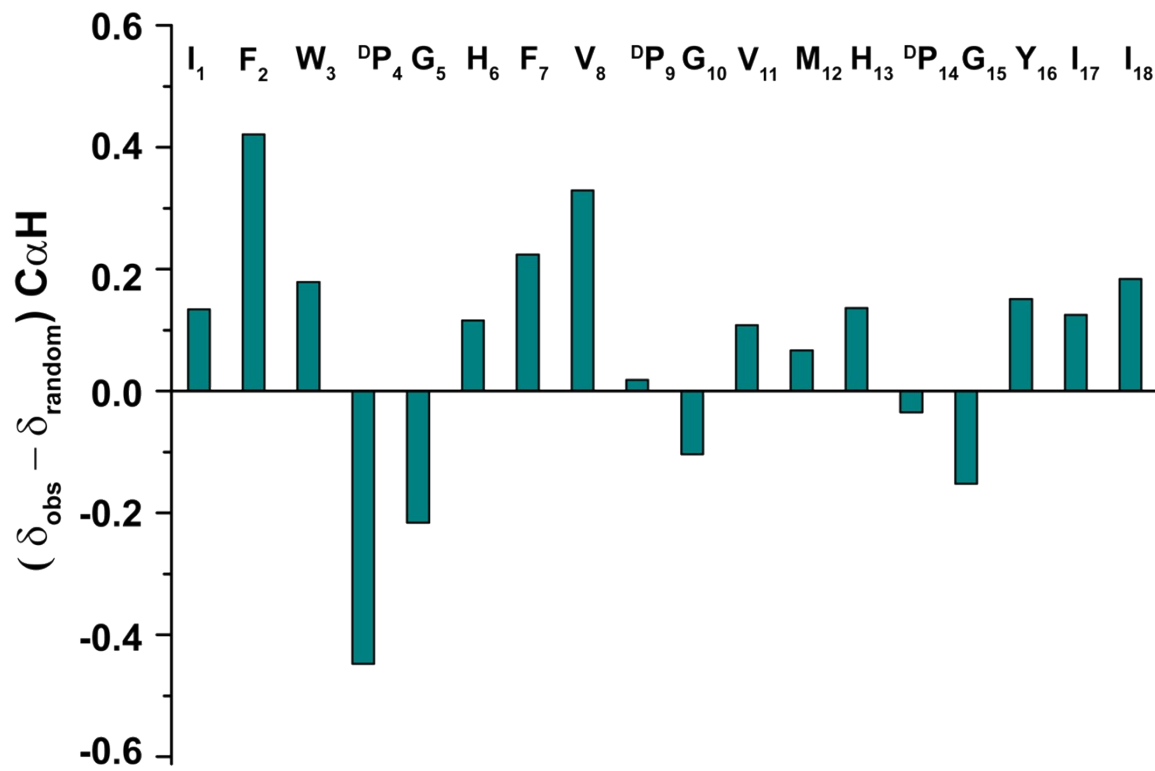

**Supplementary Figure 1:**  $\alpha\text{H}$  chemical shift deviation from random coil values of peptide-1. The positive deviation of residues I1, F2, W3, H6, F7, V8, V11, M12, H13, Y16, I17 and I18 indicates four stranded  $\beta$ -sheet structure

Figure S2

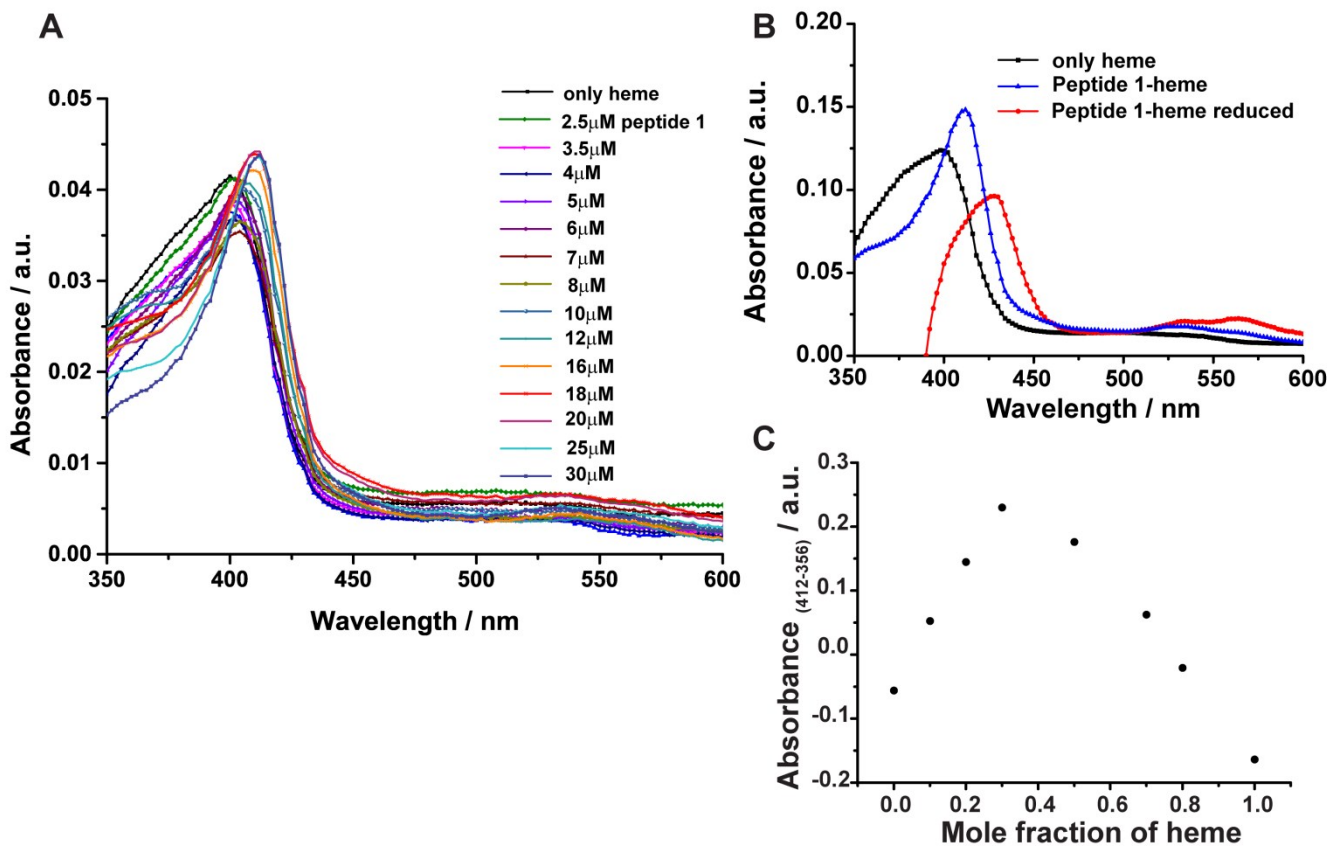

**Supplementary Figure 2:** (A) Absorption changes of heme (2  $\mu\text{M}$ ) on titrating peptide-1(0-30  $\mu\text{M}$ ) in 50 mM sodium phosphate buffer, pH 7.2 containing 2 mM DPC. (B) Absorption spectra of heme alone (black), peptide1-heme oxidized (blue) and peptide1-heme reduced (red). Concentration of peptide and heme was 10  $\mu\text{M}$  in 2 mM DPC, 50 mM sodium phosphate buffer, pH 7.2 (C) Jobs plot of peptide-1. The shift in Soret band of heme at 412 nm upon binding to peptide-1 and further shift to 428 nm after reduction by sodium dithionite and low intense peaks at 530 and 560 nm indicated bis-histidine coordination. The job plot shows peptide:heme stoichiometry 2:1

Figure S3

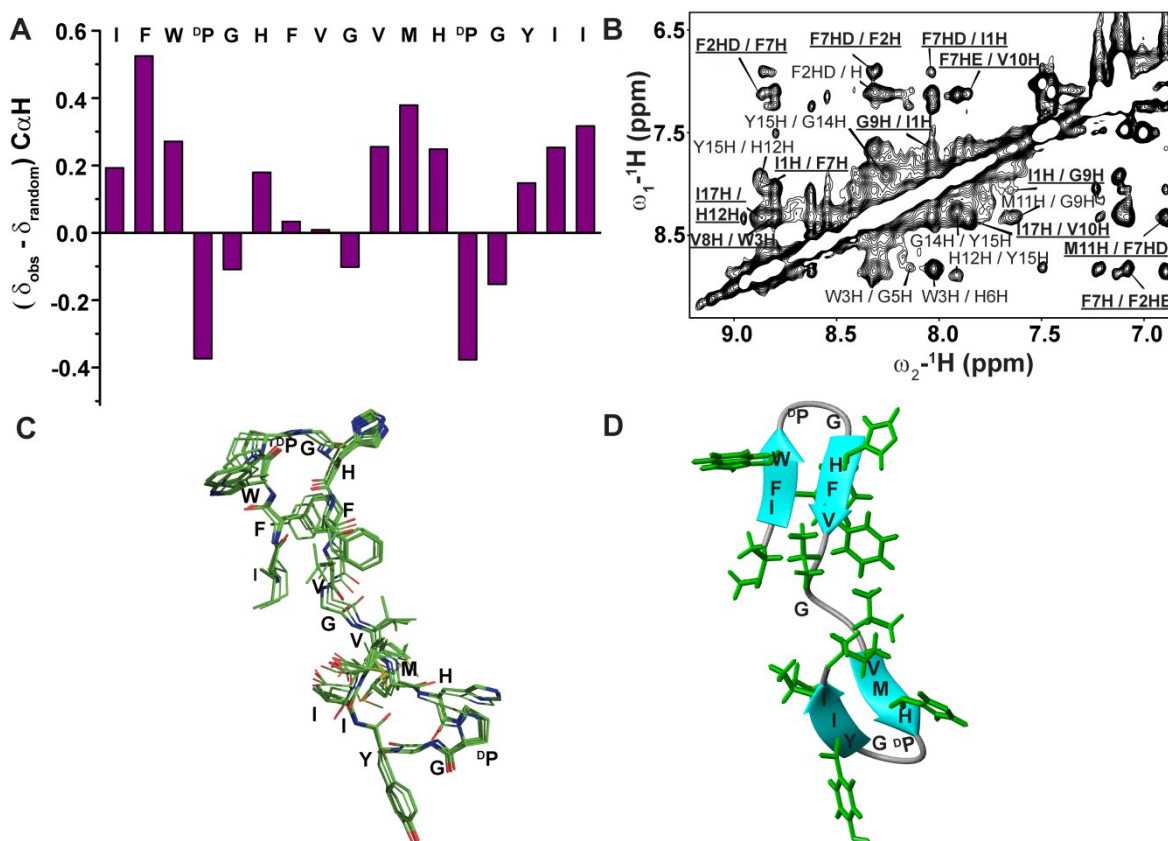

**Supplementary Figure 3:** (A)  $\alpha\text{H}$  chemical shift deviation from random coil of peptide-2 (B) Section of two-dimensional  $^1\text{H}$ - $^1\text{H}$  NOESY spectra showing NOE connectivity between amide protons. Long range NOEs are underlined and boldfaced. (C) Superimposed twenty low energy structures of peptide-2. (D) A selected structure of peptide-2 showing side chain packing within  $\beta$ -sheets.

Figure S4

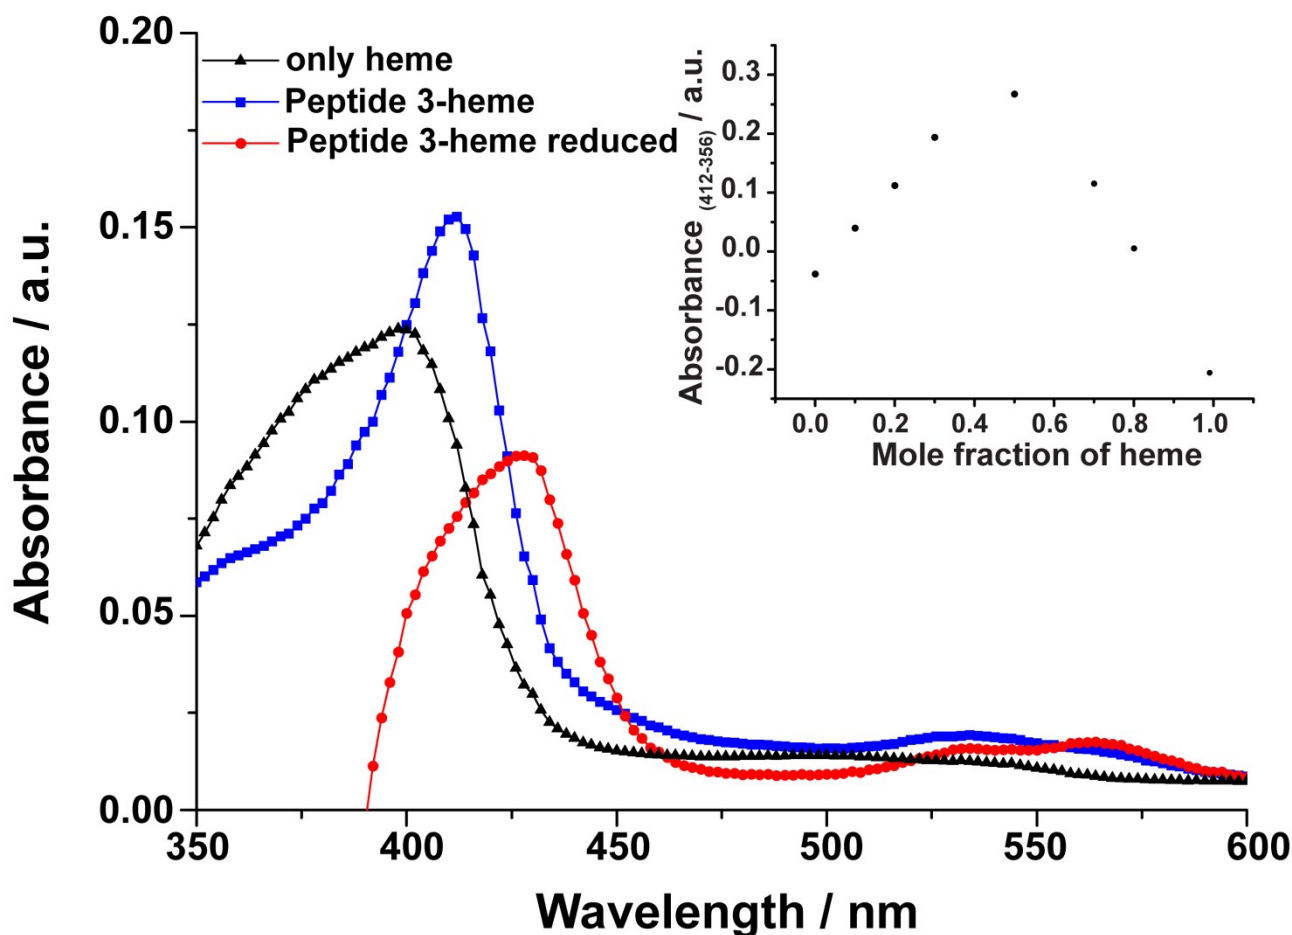

**Supplementary Figure 4:** Absorption spectra of heme alone (black), peptide 3-heme oxidized (blue) and peptide 3-heme reduced (red). Concentration of peptide and heme was 10  $\mu\text{M}$  in 2 mM DPC, 50 mM sodium phosphate buffer, pH 7.2. Job's plot of peptide-3 (onset). The shift in Soret band of heme at 412 nm upon binding to peptide-3 and further shift to 428 nm after reduction by sodium dithionite and low intense peaks at 530 and 560 nm indicated bis-histidine coordination. The job plot shows peptide:heme stoichiometry 1:1.

Figure S5

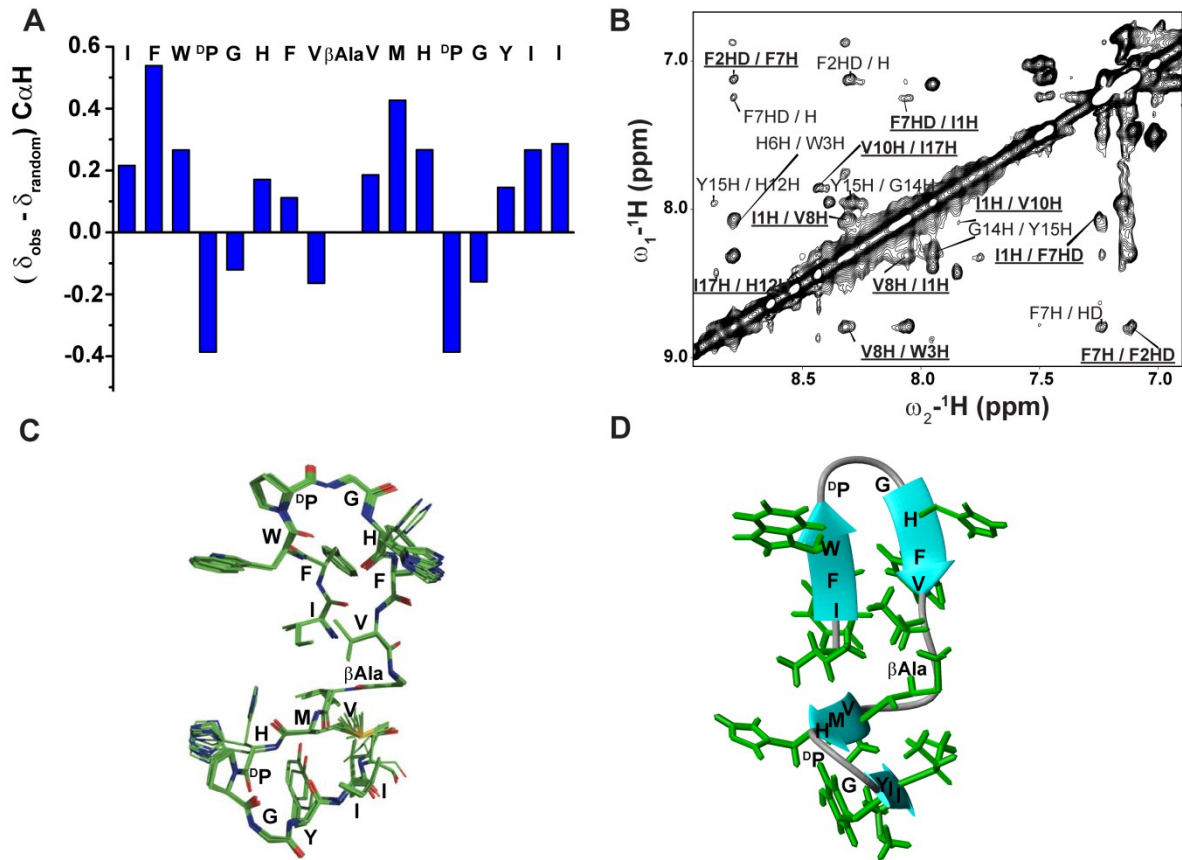

**Supplementary Figure 5:** (A)  $\alpha\text{H}$  chemical shift deviation of peptide-3 (B) Section of two-dimensional  $^1\text{H}$ - $^1\text{H}$  NOESY spectra showing NOE connectivity between amide protons. Long range NOEs are underlined and boldfaced. (C) Superimposed twenty low energy conformers of peptide-3. (D) A selected structure of peptide-3 showing side chain packing within  $\beta$ -sheets.

Figure S6

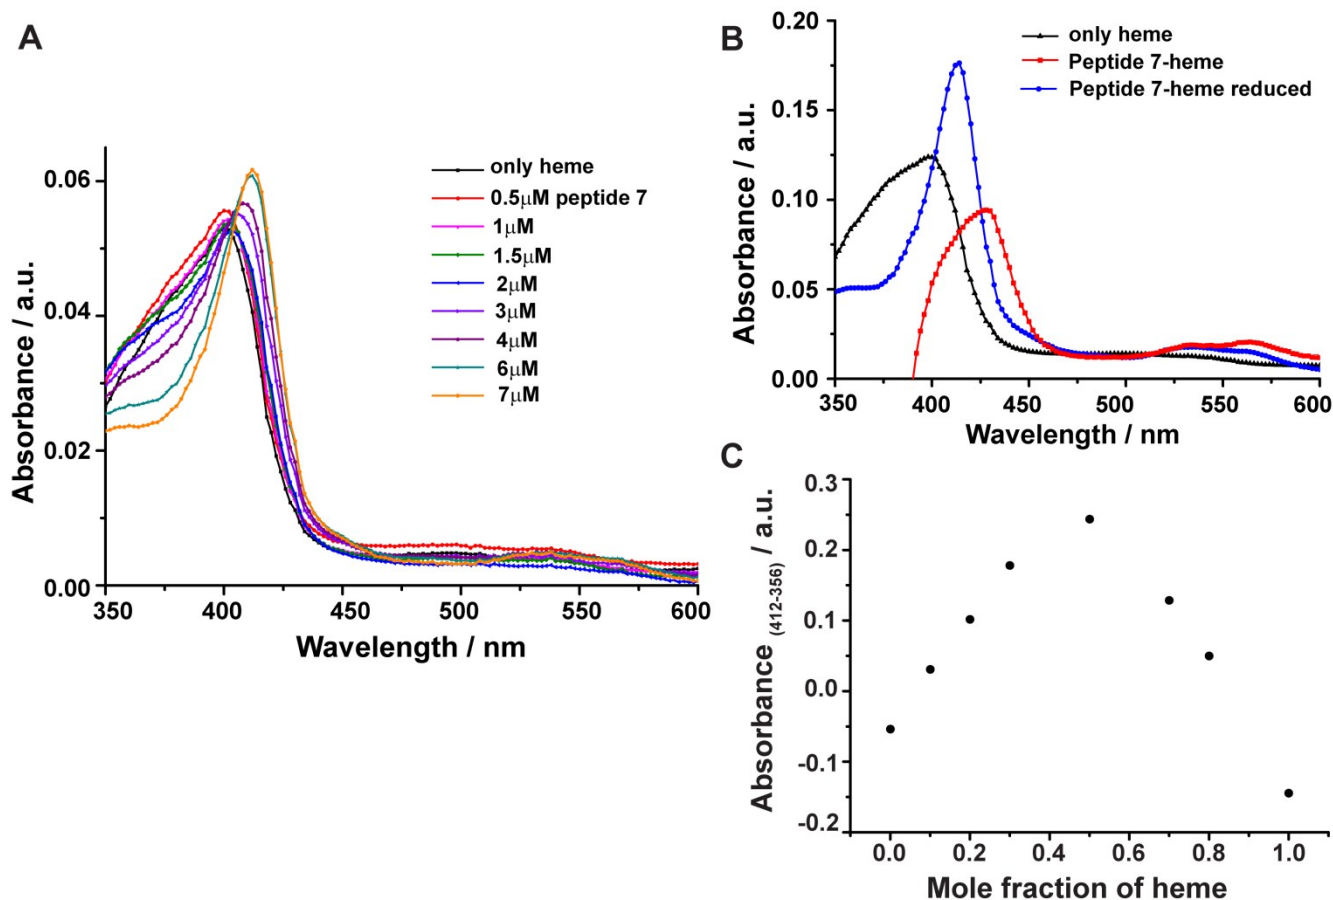

**Supplementary Figure 6:** (A) Absorption changes of heme (2  $\mu\text{M}$ ) on titrating peptide-7 (0-7  $\mu\text{M}$ ) in 50 mM sodium phosphate buffer, pH 7.2 containing 2 mM DPC. (B) Absorption spectra of heme alone (black), peptide7-heme oxidized (blue) and peptide7-heme reduced (red). Concentration of peptide and heme was 10  $\mu\text{M}$  in 2 mM DPC, 50 mM sodium phosphate buffer, pH 7.2 (C) Jobs plot of peptide-7. The shift in Soret band of heme at 412 nm upon binding to peptide-3 and further shift to 428 nm after reduction by sodium dithionite and low intense peaks at 530 and 560 nm indicated bis-histidine coordination. The job plot shows peptide:heme stoichiometry 1:1.

Figure S7

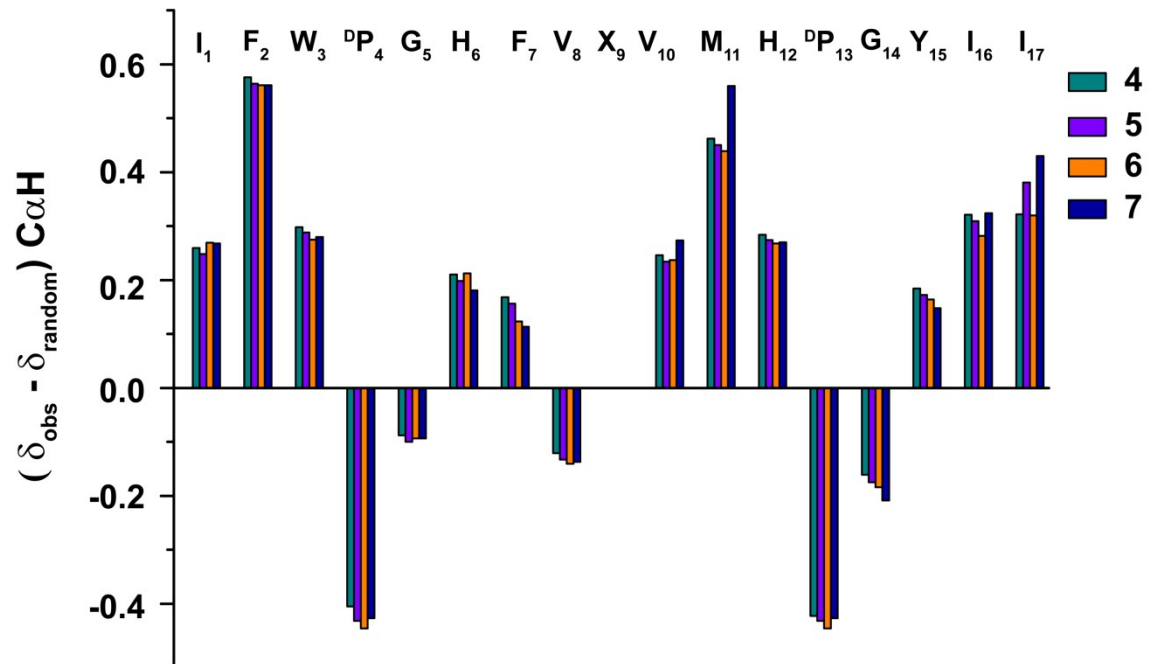

Supplementary Figure 7: Secondary chemical shift of  $\alpha\text{H}$  peptide 4 to 7.



Figure S8

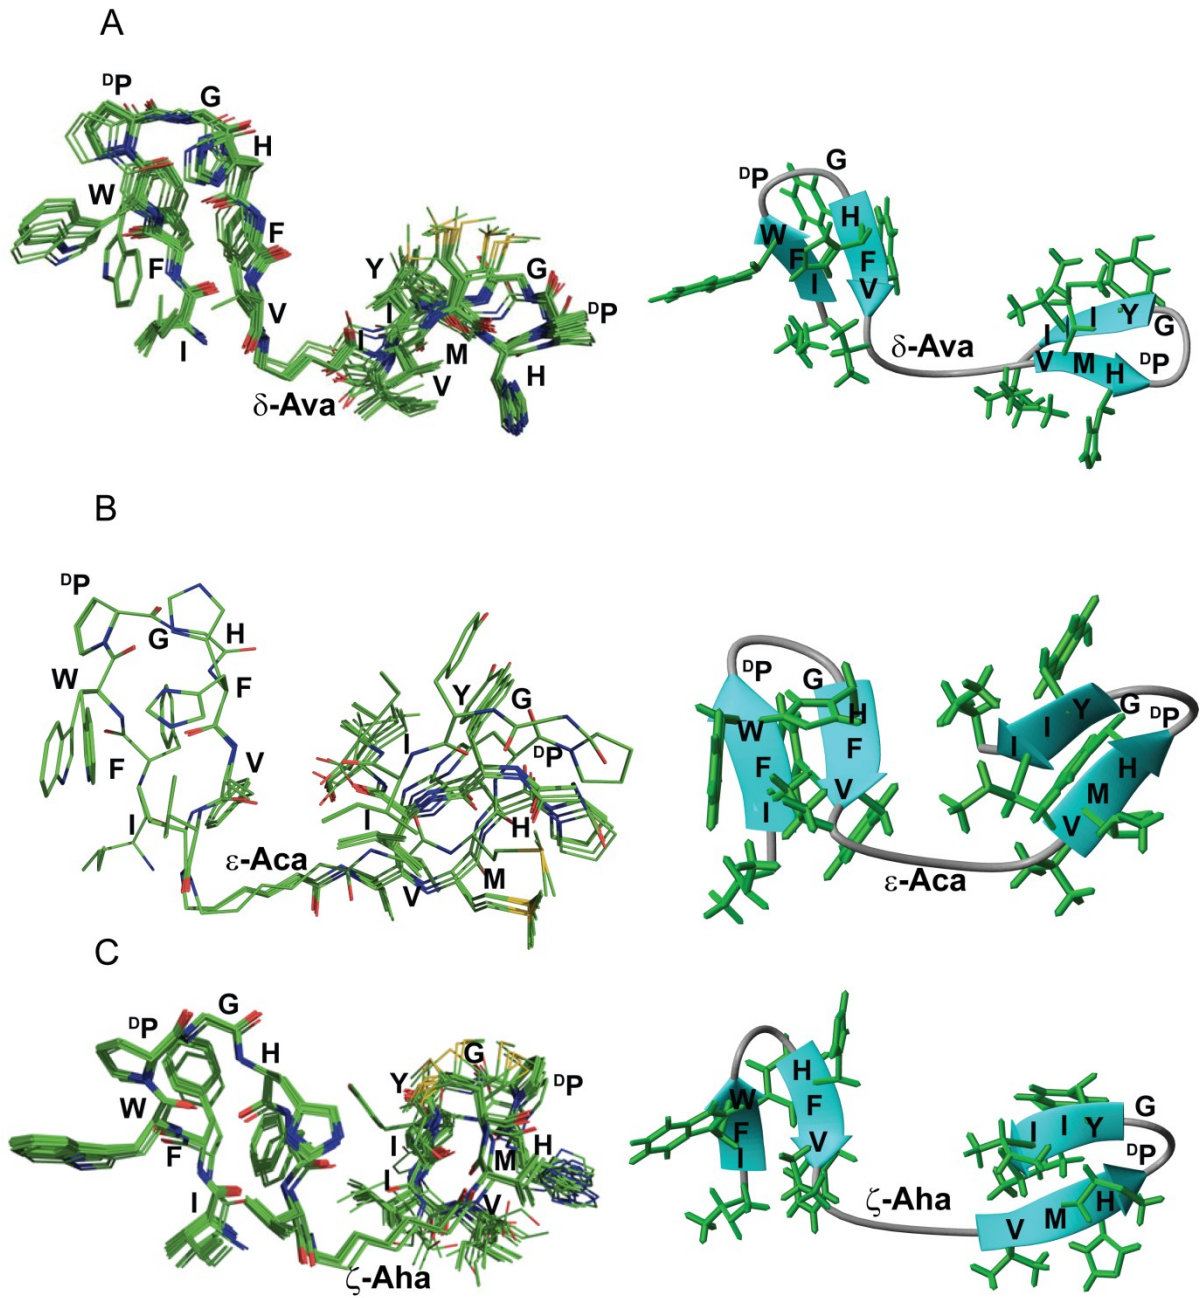

**Supplementary Figure 8:** Superimposed twenty low energy structures and one selected structure of each peptide showing side chain packing within  $\beta$ -sheets. (A) Peptide-4, (B) Peptide-5 and (C) Peptide-6

Figure S9

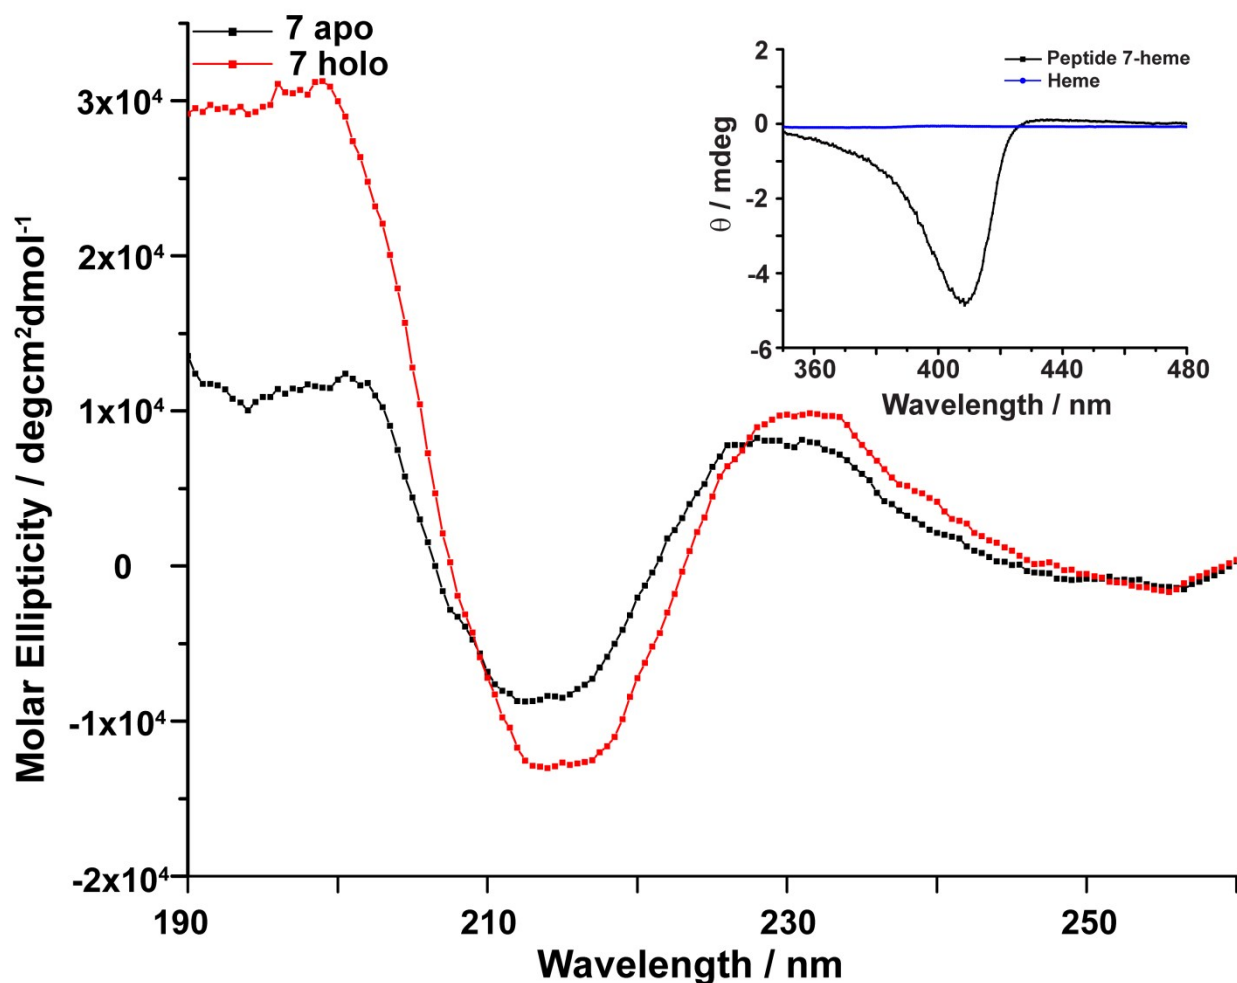

**Supplementary Figure 9:** Far-UV CD spectra of peptide-7 alone (black) and heme-bound (red). Concentration of peptide and heme was  $100 \mu\text{M}$  in 2 mM DPC, 50 mM sodium phosphate buffer, pH 7.2. CD studies were performed using a 0.01cm path length cuvette with a 1nm bandwidth and a step size of 0.5 nm at 0.5 seconds per data set. Near-UV CD spectra of peptide-7-heme and heme alone (in blue) (onset) were acquired in a 1 cm path length cuvette to monitor the changes in heme environment.  $8 \mu\text{M}$  of peptide along with  $8 \mu\text{M}$  heme dissolved in 2 mM DPC, sodium phosphate buffer pH 7.2 was used for the experiment.

**Figure S10**

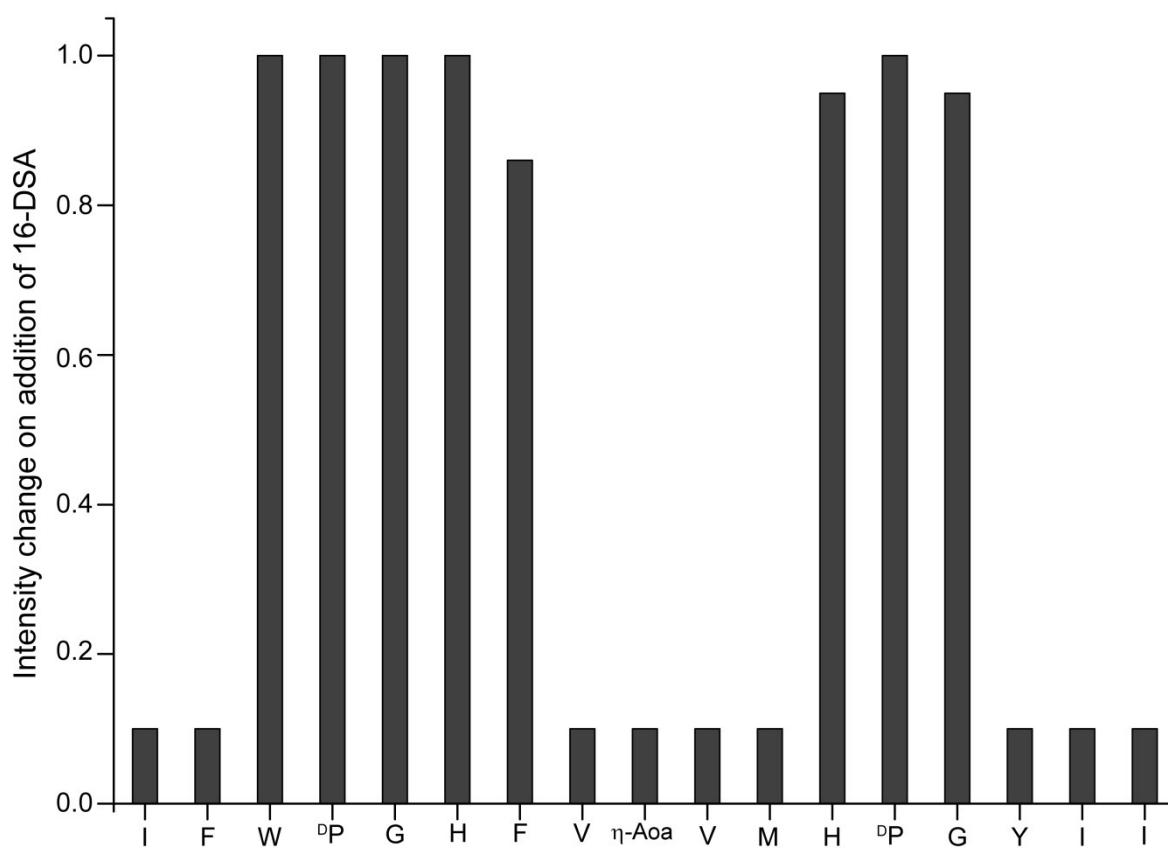

**Supplementary Figure 10:** The bar diagram showing ratio of intensity of  $C\alpha H/NH$  cross-peaks obtained from two-dimensional TOCSY spectra of peptide-7 before addition of 16-DSA and in the presence of 16-DSA (2 mM). Residues experiencing perturbation by paramagnetic 16-DSA showed intensity ratio  $<1$ .

Figure S11

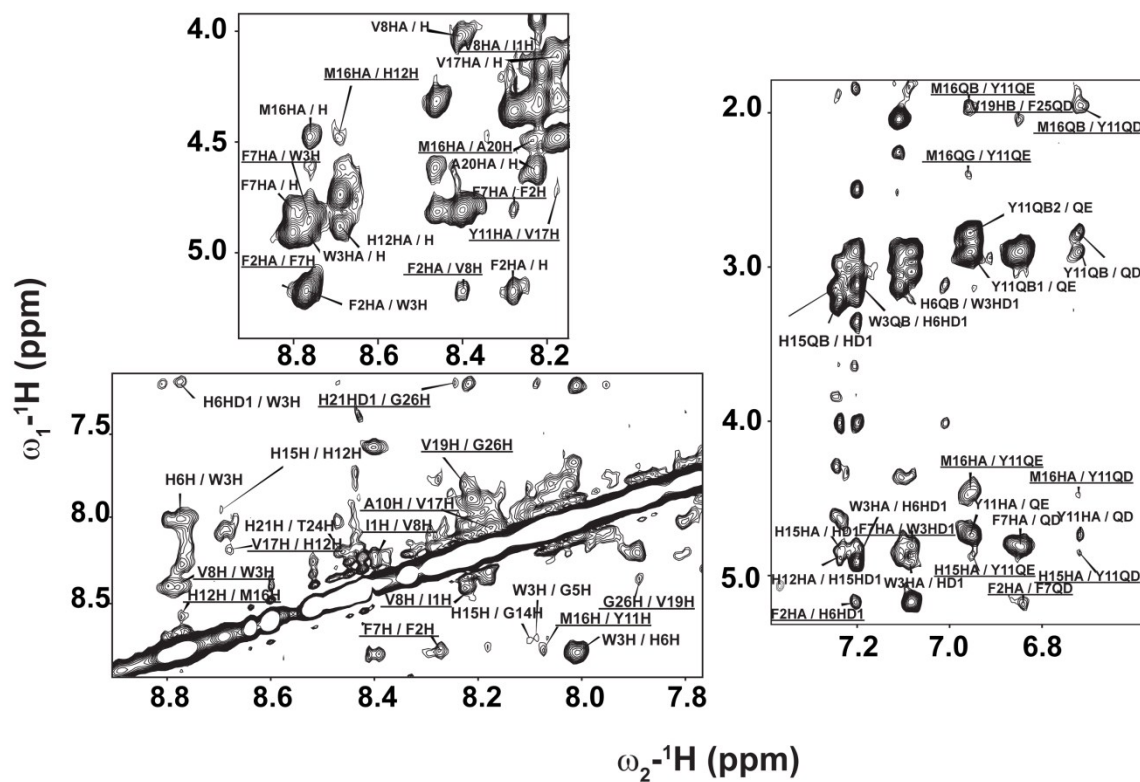

**Supplementary Figure 11:** Sections of two-dimensional  $^1\text{H}$ - $^1\text{H}$  NOESY spectra of peptide-8 showing NOE connectivity in the  $\alpha\text{H}$ -NH region (top left), NH-NH region (bottom left) and aromatic region (right). Long range NOEs are underlined and boldfaced.

Figure S12

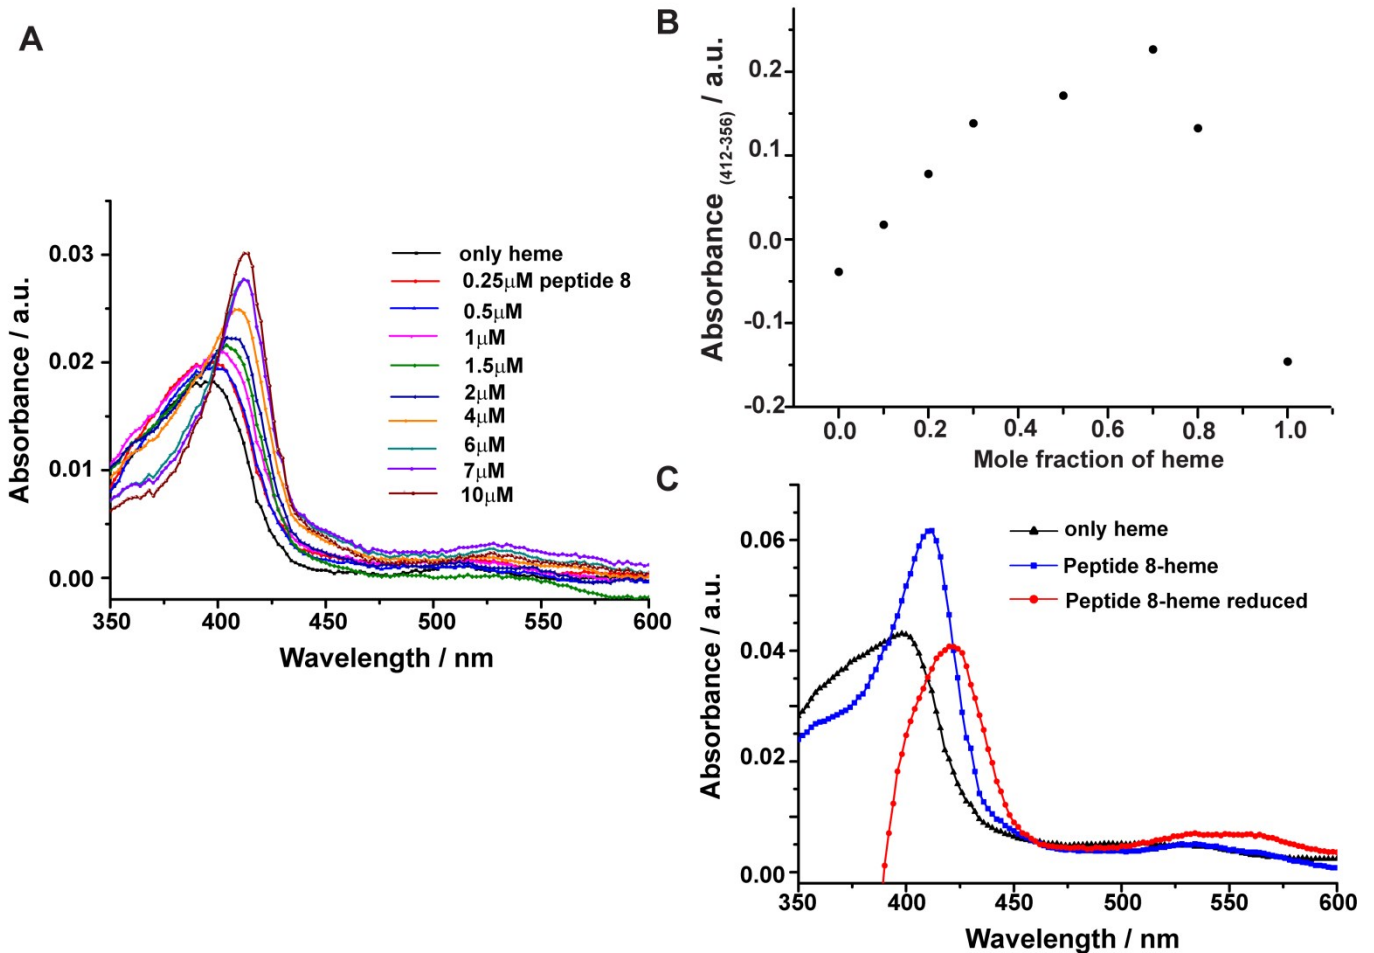

**Supplementary Figure 12:** (A) Absorption changes of heme (2  $\mu\text{M}$ ) on titrating peptide-8 (0-10  $\mu\text{M}$ ) in 50 mM sodium phosphate buffer, pH 7.2 containing 2 mM DPC. (B) Jobs plot of peptide-8. (C) Absorption spectra of heme alone (black), peptide 8-heme oxidized (blue) and peptide 8-heme reduced (red). Concentration of peptide and heme was 10  $\mu\text{M}$  and 2  $\mu\text{M}$  respectively in 2 mM DPC, 50 mM sodium phosphate buffer, pH 7.2. The shift in Soret band of heme at 412 nm upon binding to peptide-8 and further shift to 428 nm after reduction by sodium dithionite and low intense peaks at 530 and 560 nm indicated bis-histidine coordination. The job plot shows peptide:heme stoichiometry 1:2.
